# Supplementary material for: Application of psychrotolerant quorum quenching Planococcus versutus sp. L10.15T to membrane bioreactors for biofouling control at low temperatures
Source: Royal Society of Chemistry journal article supplement (doi:10.1039/d3ew00705g), 2024-01-01
Supplement: d3ew00705g1.pdf [file d3ew00705g1.pdf]

1 **Supplementary Information**

2

3 **Application of psychrotolerant quorum quenching *Planococcus versutus* sp.**

4 **L10.15<sup>T</sup> to membrane bioreactors for biofouling control at low temperatures**

5

6 Sojin Min<sup>a</sup>, Hosung Lee<sup>a</sup>, Joowan Lim<sup>a</sup>, Sang Hyun Lee<sup>b</sup>, Seungjin Lee<sup>c</sup>, Kwang-Ho Choo<sup>d</sup>,

7 Chung-Hak Lee<sup>e</sup>, and Pyung-Kyu Park<sup>a,\*</sup>

8

9 <sup>a</sup>Department of Environmental and Energy Engineering, Yonsei University, Wonju, Gangwon-

10 do 26493, Republic of Korea

11 <sup>b</sup> Department of Earth and Environmental Sciences, University of Minnesota, Minneapolis,

12 MN 55455, U.S.A.

13 <sup>c</sup>Department of Chemistry, Georgia Gwinnett College, Lawrenceville, GA 30043, U.S.A.

14 <sup>d</sup>Department of Environmental Engineering, Kyungpook National University, Daegu 41566,

15 Republic of Korea

16 <sup>e</sup> School of Chemical and Biological Engineering, Seoul National University, Seoul 08826,

17 Republic of Korea

18 \*Corresponding author.

19 E-mail address: [pkpark@yonsei.ac.kr](mailto:pkpark@yonsei.ac.kr) (P.-K. Park)

20

21

22 **Table S1** Operating conditions of MBRs

| <b>Parameter</b>               | <b>Value</b>      |
|--------------------------------|-------------------|
| Solid retention time (SRT)     | 30 d              |
| Hydraulic retention time (HRT) | 6 h               |
| Reactor temperature            | 10°C              |
| pH                             | 7.20 (±1.0)       |
| Dissolved oxygen (DO)          | 5.75 (±0.75) mg/L |

23

24 **Table S2** Composition of synthetic wastewater

| <b>Component</b>                         | <b>Concentration [mg/L]</b> |
|------------------------------------------|-----------------------------|
| Glucose                                  | 160                         |
| Yeast extract                            | 16                          |
| Bacteriological peptone                  | 120                         |
| $(\text{NH}_4)_2\cdot\text{SO}_4$        | 104                         |
| $\text{KH}_2\text{PO}_4$                 | 33                          |
| $\text{MgSO}_4\cdot 7\text{H}_2\text{O}$ | 32                          |
| $\text{MnSO}_4\cdot 4\text{H}_2\text{O}$ | 2.8                         |
| $\text{FeCl}_2\cdot 6\text{H}_2\text{O}$ | 0.1                         |
| $\text{CaCl}_2\cdot 2\text{H}_2\text{O}$ | 3.2                         |
| $\text{NaHCO}_3$                         | 315                         |

25

26

27 **Table S3** C8-HSL degradation rates by L10.15<sup>T</sup>- beads at 10, 17, and 25°C during the first 15  
28 min

| <b>C8-HSL degradation rate (h<sup>-1</sup>)</b> |       |
|-------------------------------------------------|-------|
| 10°C                                            | 2.410 |
| 17°C                                            | 0.410 |
| 25°C                                            | 0.258 |

29

30 **Table S4** Live/dead cell ratios in L10.15<sup>T</sup>- and BH4-beads (n=3)

|                     | <b>Live/dead cell ratio</b> |
|---------------------|-----------------------------|
| L10.15 <sup>T</sup> | 1.39 (±0.12)                |
| BH4                 | 1.52 (±0.19)                |

31

32 **Table S5** Chemical oxygen demand (COD) and mixed liquor suspended solid (MLSS) in  
33 MBRs

|                     | <b>L10.15<sup>T</sup>-MBR</b> | <b>BH4-MBR</b>      |
|---------------------|-------------------------------|---------------------|
| Feed COD [mg/L]     | 303 ( $\pm 17$ )              | 295 ( $\pm 24$ )    |
| Broth COD [mg/L]    | 48 ( $\pm 8$ )                | 53 ( $\pm 14$ )     |
| Permeate COD [mg/L] | 28 ( $\pm 4$ )                | 29 ( $\pm 7$ )      |
| MLSS [mg/L]         | 5,201 ( $\pm 204$ )           | 5,268 ( $\pm 180$ ) |

34
